# Supplementary material for: A novel BODIPY-based theranostic agent for in vivo fluorescence imaging of cerebral Aβ and ameliorating Aβ-associated disorders in Alzheimer's disease transgenic mice
Source: Royal Society of Chemistry journal article supplement (doi:10.1039/d3md00744h), 2024-01-01
Supplement: d3md00744h1.pdf [file d3md00744h1.pdf]

## Supporting Information.

### **A novel BODIPY-based theranostic agent for in vivo fluorescent imaging of cerebral A $\beta$ and ameliorating A $\beta$ -associated disorders in Alzheimer's disease transgenic mice†**

Jingjing Zhang<sup>‡, a, b, c</sup> Wenming Ren<sup>‡, a, b</sup> Xiaohui Liu, <sup>a, c</sup> Jingjing Chen, <sup>d</sup> Yuteng Zeng, <sup>a, e</sup> Huaijiang Xiang, <sup>a, c</sup> Youhong Hu, <sup>\*a, c, d</sup>, Haiyan Zhang, <sup>\*a, b, c</sup>

a State Key Laboratory of Drug Research, Shanghai Institute of Materia Medica, Chinese Academy of Sciences, Shanghai 201203, China;

b CAS Key Laboratory of Receptor Research, Shanghai Institute of Materia Medica, Chinese Academy of Sciences, Shanghai 201203, China;

c University of Chinese Academy of Sciences, No.19A Yuquan Road, Beijing 100049, China;

d School of Pharmaceutical Science and Technology, Hangzhou Institute for Advanced Study, UCAS, 1 Xiangshanzhi Road, Hangzhou, 310024, China

e School of Life Science and Technology, ShanghaiTech University, Shanghai, 201210, China

†Jingjing Zhang and Wenming Ren contributed equally to this work.

\* Corresponding author.

E-mail address: hzhang@simm.ac.cn (Haiyan Zhang); yhhu@simm.ac.cn (Youhong Hu).

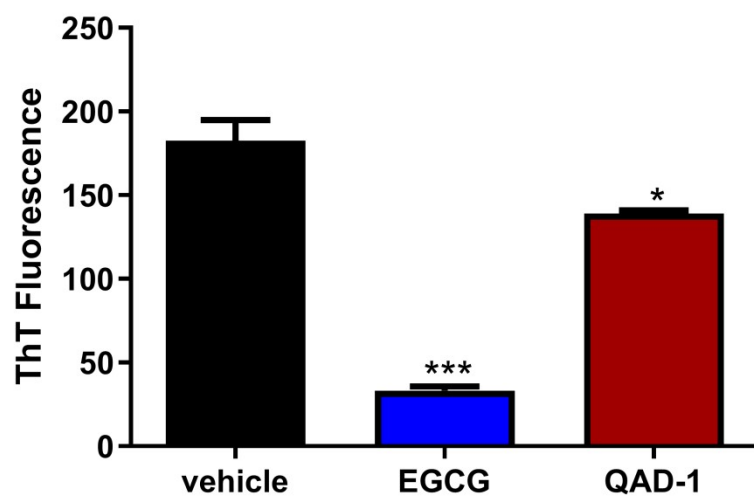

**Figure S1.** ThT fluorescence of A $\beta$  incubated with QAD-1. Final concentration of A $\beta$  is 4.25  $\mu$ M; Final concentration of QAD-1 and EGCG is 1  $\mu$ M Data were presented as the mean  $\pm$  SD, n = 4, \* P < 0.05, \*\*\* P < 0.001 compared with the A $\beta$ 42 group.

## Synthesis Details

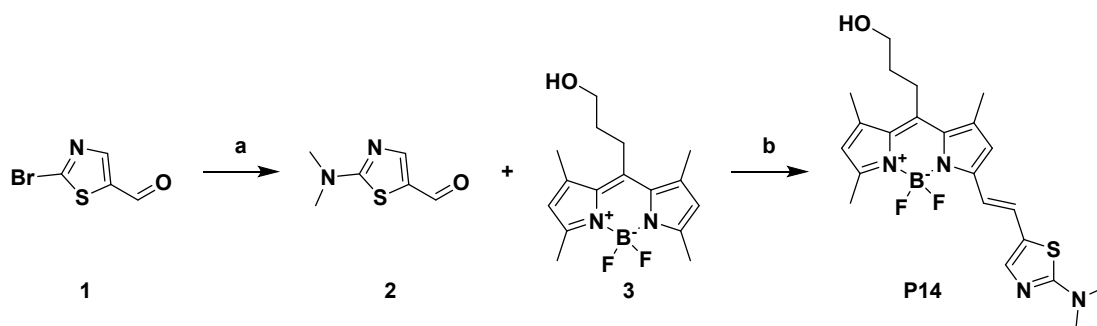

**Scheme S1.** Synthesis route of probe **P14**: a) Dimethylamine solution (33% w/w), reflux, 4h; b) CH<sub>3</sub>COOH/piperidine, toluene/CHCl<sub>3</sub>, reflux, 4h.

## Experimental procedures and compound characterization

5-(dimethylamino)thiophene-2-carbaldehyde (**3**) To a solution of 2-Bromo-5-formylthiazole (2.00 g, 10.42 mmol) in H<sub>2</sub>O/DMSO (v:v=4:1, 50 mL) was added dimethylaniline (5.00 mL, 33% aqueous solution, 36.74 mmol). The mixture was stirred at 50 °C for 4 h, and then cooled to room temperature. After extraction with EtOAc, the organic layer was washed with brine, dried over Na<sub>2</sub>SO<sub>4</sub>, and concentrated to dryness. The residue was purified by silica gel flash chromatography (EtOAc/hexanes) to give **2** (1.30 g, 80%) as a light yellow powder. <sup>1</sup>H NMR (400 MHz, Chloroform-*d*) δ 9.67 (s, 1H), 7.87 (s, 1H), 3.22 (s, 6H).

3-(5,5-difluoro-1,3,7,9-tetramethyl-5H-4H,5H-dipyrrolo[1,2-c:2',1'-f][1,3,2]diazaborinin-10-yl)propan-1-ol (**3**) was prepared according to the literature procedures<sup>1</sup>.

(E)-3-(3-(2-(2-(dimethylamino)thiazol-5-yl)vinyl)-5,5-difluoro-1,7,9-trimethyl-5H-5λ<sup>4</sup>,6λ<sup>4</sup>-dipyrrolo[1,2-c:2',1'-f][1,3,2]diazaborinin-10-yl)propan-1-ol (**P14**) To a solution of alcohol **3** (980 mg, 3.20 mmol) in toluene/CHCl<sub>3</sub> mixture (v:v=6:1, 70 mL) was added aldehyde **2** (500 mg, 3.20 mmol), piperidine (200 μL) and acetic acid (200 μL), The mixture was stirred under

reflux for 4 h. After the mixture had cooled to room temperature, H<sub>2</sub>O was added and extracted with DCM. The organic phase was dried over Na<sub>2</sub>SO<sub>4</sub> and concentrated to dryness. The residue was purified by silica gel flash chromatography (EtOAc/hexanes/DCM=5:1:3) to give dye P14 (480 mg, 34%) as a purple blue powder. <sup>1</sup>H NMR (600 MHz, Chloroform-*d*) δ 7.27 (s, 1H), 7.23 (d, *J* = 15.7 Hz, 1H), 6.96 (d, *J* = 15.7 Hz, 1H), 6.58 (s, 1H), 6.04 (s, 1H), 3.79 (t, *J* = 5.7 Hz, 2H), 3.16 (s, 6H), 3.09 – 3.00 (m, 2H), 2.54 (s, 3H), 2.45 (s, 3H), 2.43 (s, 3H), 1.90 – 1.82 (m, 2H). <sup>13</sup>C NMR (151 MHz, Chloroform-*d*) δ 171.51, 152.33, 143.52, 143.23, 140.37, 138.84, 132.96, 131.47, 127.32, 126.93, 121.25, 118.04, 115.54, 62.49, 40.26, 34.62, 24.91, 16.75, 16.40, 14.55. HRMS (ESI-TOF) *m/z*: [M + H]<sup>+</sup> calcd for C<sub>22</sub>H<sub>28</sub>BF<sub>2</sub>N<sub>4</sub>OS<sup>+</sup>: 445.2039; found: 445.2082. HPLC purity: 98.9%.

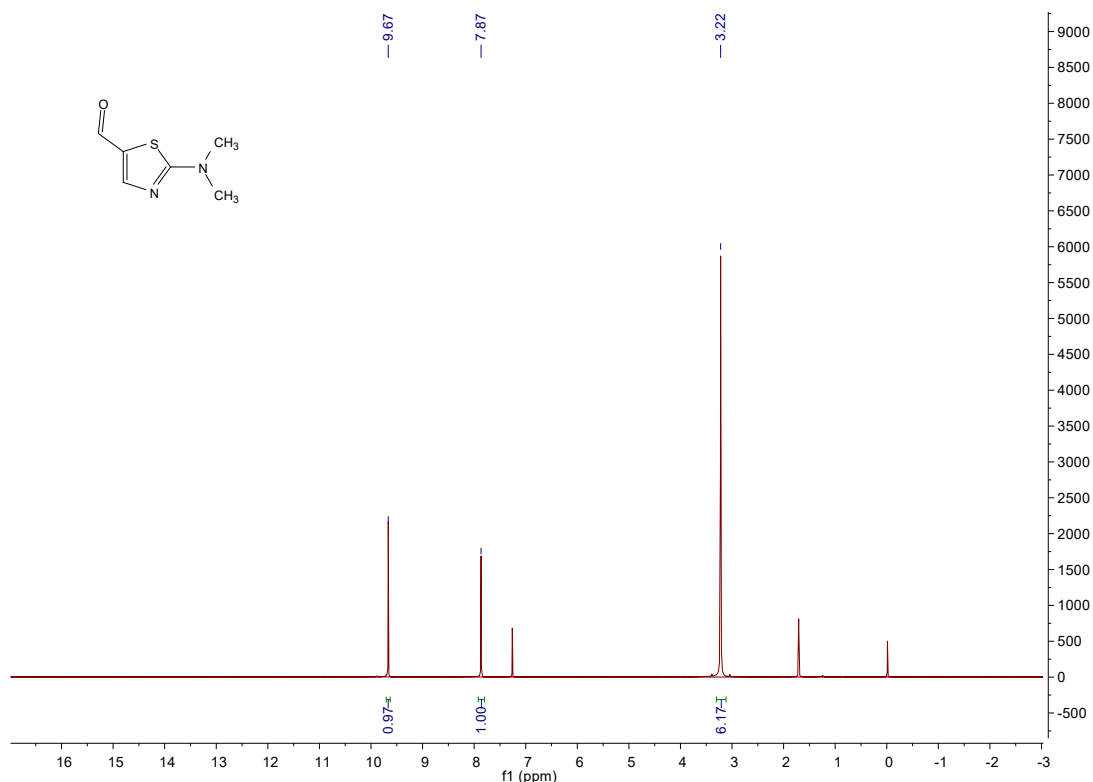

**Figure S2.** <sup>1</sup>H NMR spectrum of 2.

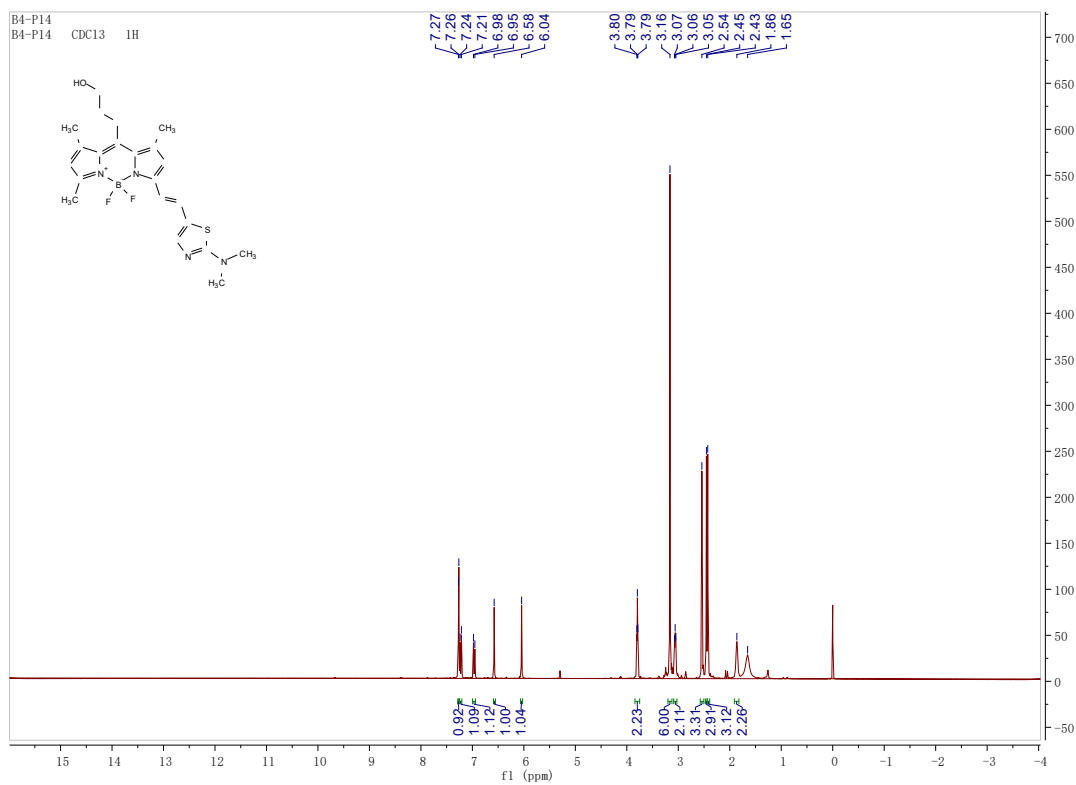

**Figure S3.**  $^1\text{H}$  NMR spectrum of **P14**

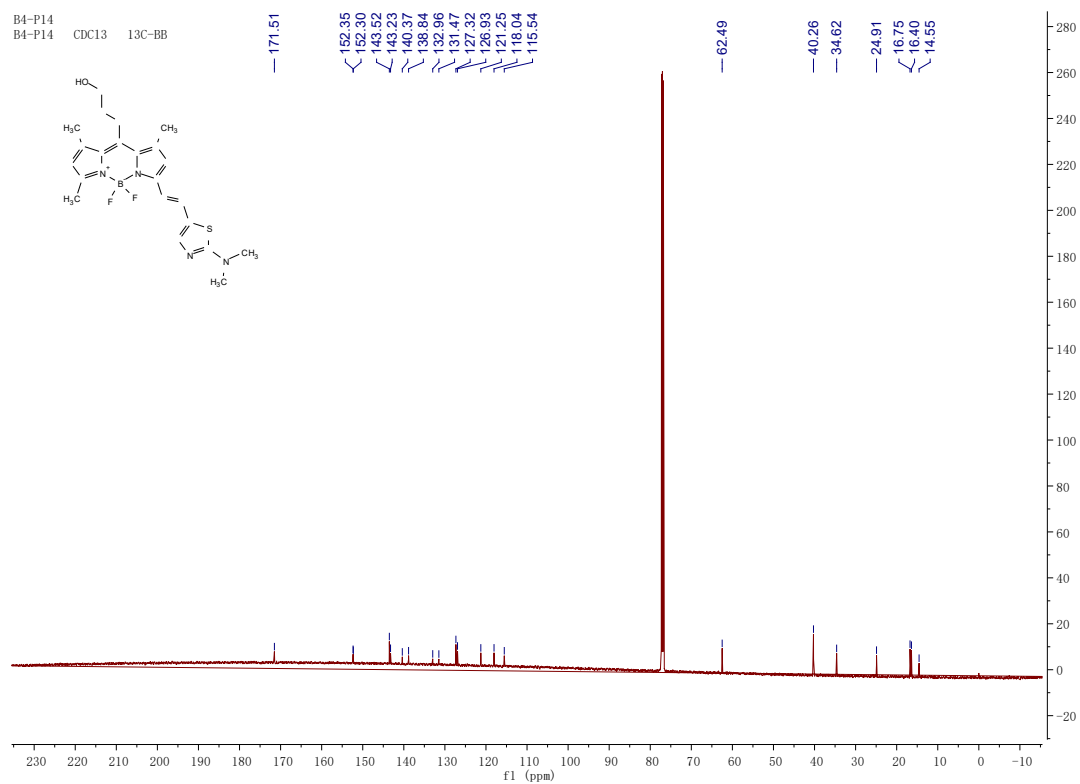

Figure S4. <sup>13</sup>C NMR spectrum of P14.

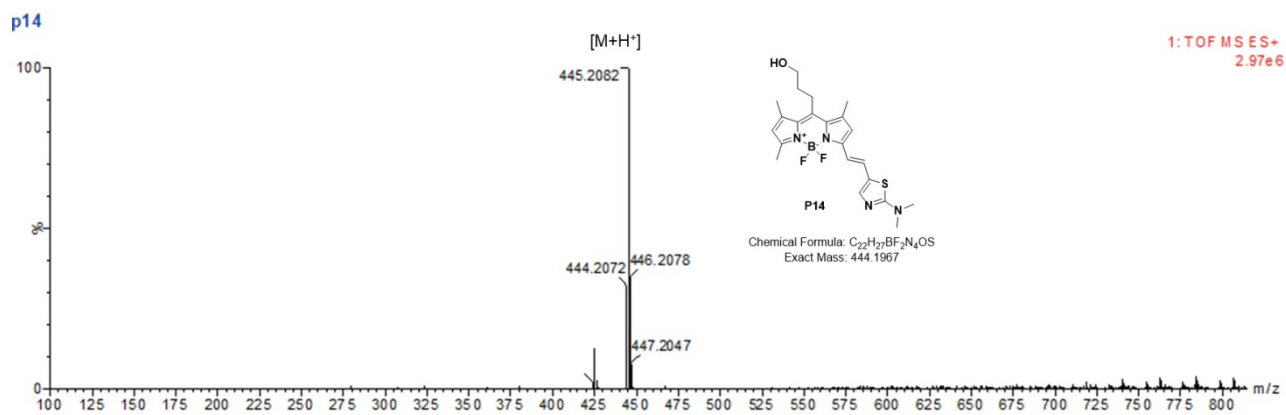

Figure S5. MS spectrum of P14.

数据文件: C:\DATA\JXY\JXY000004.D  
样品名称: P14

=====  
操作者 : JXY  
仪器 : 仪器 2 位置 : 样品瓶 14  
进样日期 : 2022-7-3 7:39:34 下午  
进样量 : 20 µl  
采集方法 : C:\CHEM32\2\METHODS\MYJ-2.M  
最后修改 : 2022-7-3 6:16:36 下午 : JXY  
(调用后修改)  
分析方法 : C:\DATA\XZC\QH0825 2022-07-02 13-02-18\HU813A.M  
最后修改 : 2022-7-2 1:55:27 下午 : JJS

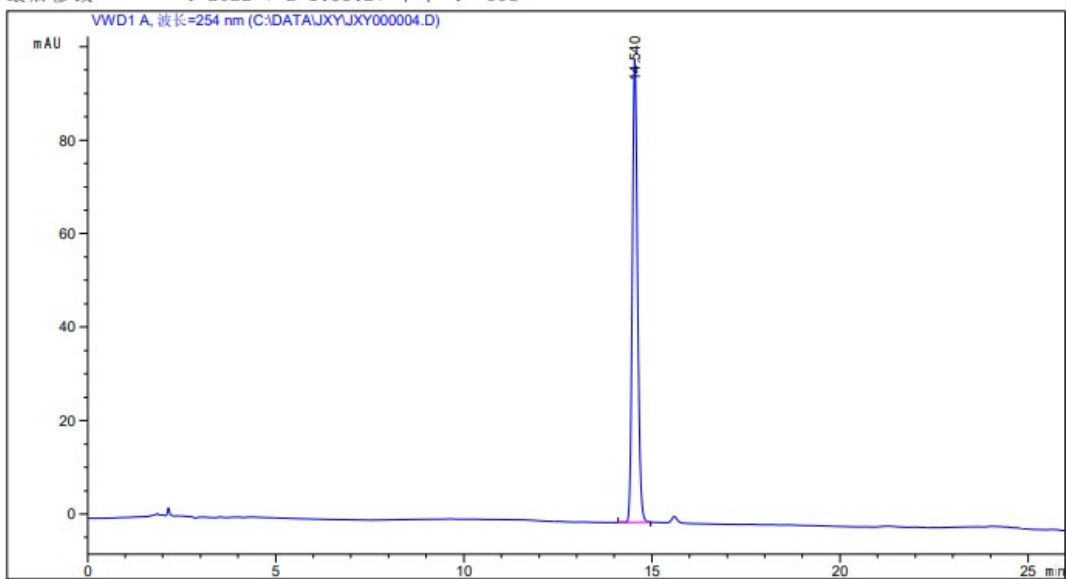

=====  
面积百分比报告  
=====

排序 : 信号  
乘积因子 : 1.0000  
稀释因子 : 1.0000  
内标使用乘积因子和稀释因子

信号 1: VWD1 A, 波长=254 nm

| 峰 # | 保留时间 [min] | 类型 | 峰宽 [min] | 峰面积 mAU *s | 峰高 [mAU] | 峰面积 %    |
|-----|------------|----|----------|------------|----------|----------|
| 1   | 14.540     | BB | 0.1497   | 960.77997  | 98.93221 | 100.0000 |

总量 : 960.77997 98.93221

=====  
**Figure S6. HPLC purity of P14.**



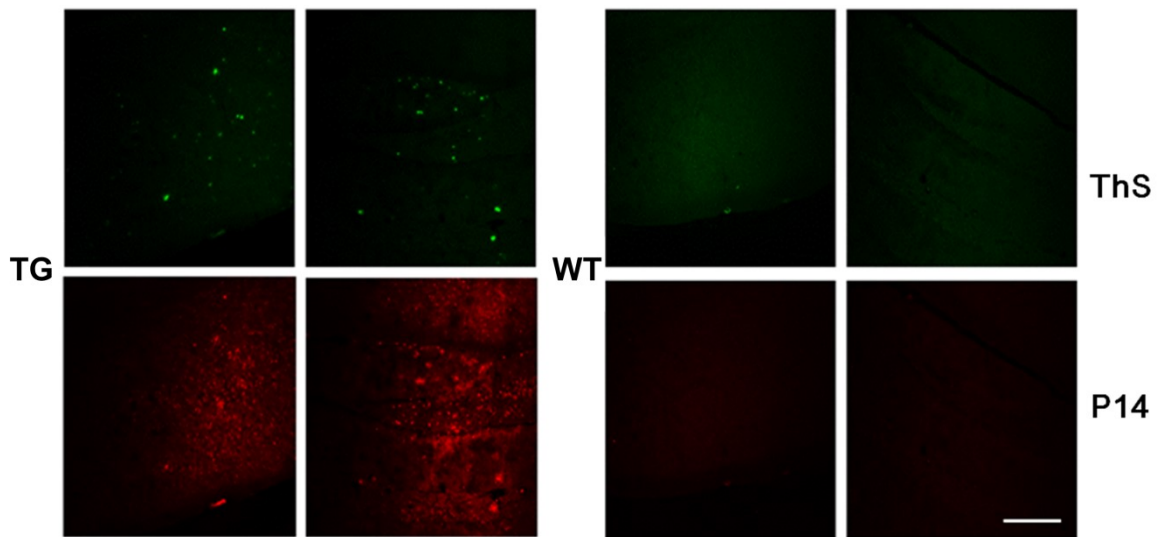

**Figure S7.** *Ex vivo* fluorescence imaging of APP/PS1 (TG) and wild-type mice (WT) after i.v. injection of **P14**. The excitation channel for **P14** imaging = 589 nm, emission channel = 641 nm; the excitation channel for ThS imaging = 488 nm, emission channel = 550 nm; scale bar= 250  $\mu\text{m}$ ; n = 3.

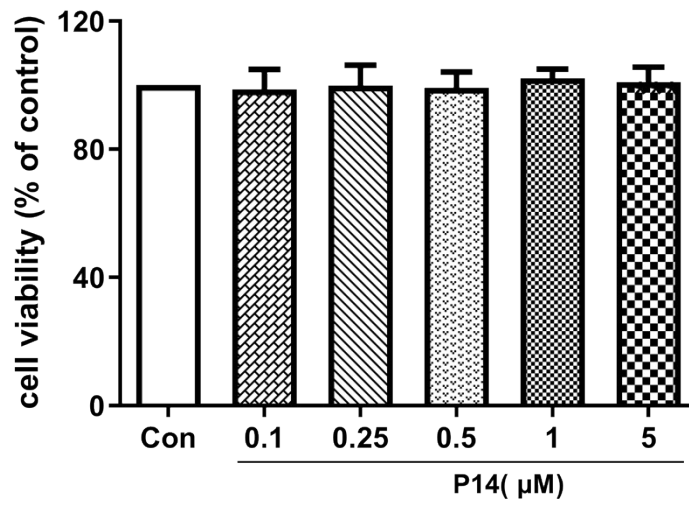

**Figure S8.** Effect of **P14** on cell viability of primary neurons. Cell viability conducted by MTT assay. Data were presented as the mean  $\pm$  SD,  $n = 5$ ; Con: control group.

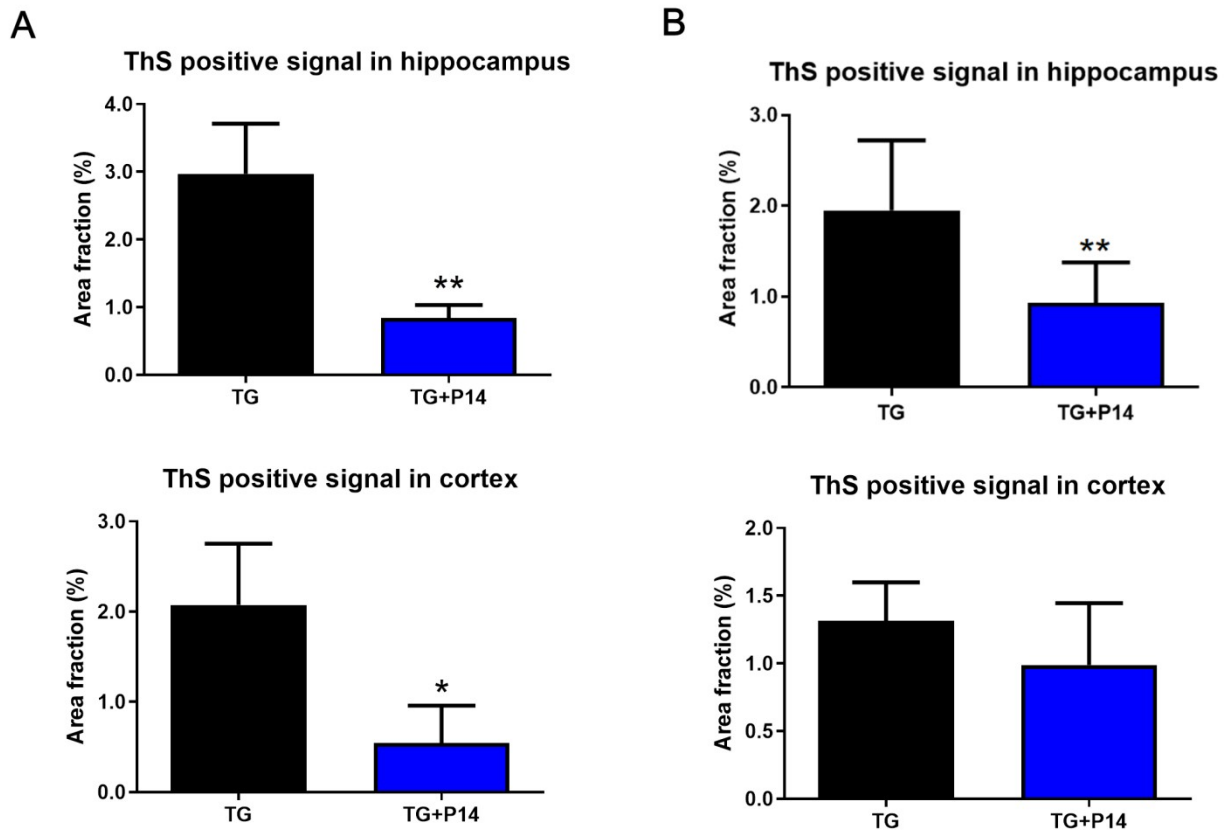

**Figure S9.** Quantitative analysis of ThS positive signals in brain sections. (A) The results of quantitative analysis of ThS positive signals in brain sections of APP/PS1 mice ( $n = 3$ ). (B) The results of quantitative analysis of ThS positive signals in brain sections of 5 $\times$ FAD mice ( $n = 9-10$ ). Data are shown as mean  $\pm$  SD. \* $P < 0.05$ , \*\* $P < 0.01$  compared with the TG group. WT: wild type mice; TG: APP/PS1 mice in Panel A; 5 $\times$  FAD mice in Panel B.

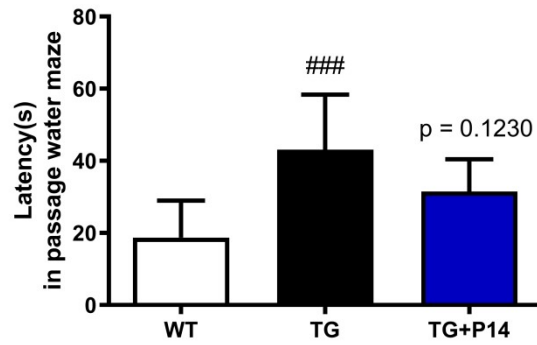

**Figure S10.** Latency of passage water maze of APP/PS1 transgenic mice and wild type mice.

Data were presented as the mean  $\pm$  SD, ###  $P < 0.001$  compared with the WT group;  $n = 6-10$ . WT: wild type mice; TG: APP/PS1 mice.

- 1 W. M. Ren, M. M. Xu, S. H. Liang, H. J. Xiang, L. Tang, M. K. Zhang, D. J. Ding, X. Li, H. Y. Zhang and Y. H. Hu, *Biosens Bioelectron*, 2016, **75**, 136-141.
